# Supplementary material for: Juvenile idiopathic scoliosis treated with posterior arthrodesis and segmental pedicle screw instrumentation before the age of 9 years: a 5-year follow-up
Source: Scoliosis. 2009 Jan 6;4:1. doi: 10.1186/1748-7161-4-1 (PMC2633314; doi:10.1186/1748-7161-4-1)
Supplement: Additional File 5 — 3-D measurement results of patient 1 with satisfactory result. The data provided represent the 3-D measurement results of patient 1. [file 1748-7161-4-1-S5.xls]

## Sheet: Sayfa1
vertebrae	preop x	early postop x	latest postop x	preop y	early postop y	latest postop y	preop z	early postop z	latest postop z
T1	23	23	23	-2	0	0	0	0	0
T2	19.9	22	19.9	0	0	0	0	0	0
T3	18.19	11.9	18.1	0	-6	0	0	-3	0
T4	4.6	1.9	7.6	-6.3	-10.7	-6.4	-0.5	-9.2	-0.8
T5	-7.12	-8.33	-6.32	-9.8	-13.19	-6.3	0	-6.69	-0.4
T6	3.9	1	-1	-22.1	-5.01	-8.1	-6.6	-5.5	-2
T7	-0.4	-11.2	-4.3	-13.8	-5.9	-5.2	-5.02	-5	-3.5
T8	-4.2	-13.7	-5.6	-11.6	-5.4	-5.2	-12	-17.5	-7.3
T9	-13.6	-8.5	-9.6	-4.5	-0.4	-1.9	-19.46	-10.2	-11.09
T10	-19.6	-13.9	-4.2	15.9	-2.6	4	-14.6	-2.6	-5.8
T11	-16.8	-9	-7.3	24.9	-0.7	5.3	-14.1	-4.9	-1
T12	-16.67	-0.8	-1.6	21.3	7.5	7.74	-0.05	0.4	-0.05
L1	-15.4	-0.6	-1.2	23.5	3.05	4.6	1.1	-1.1	0.8
L2	-6.8	2.5	-3.7	18.4	3.7	6.8	9.55	4.1	5.8
L3	-4.3	1.6	3.6	-7.12	-0.4	-3.36	6.2	2.9	3.05
L4	-9.1	-9.3	1.8	-6.8	-6	-5.6	5.4	1.9	1.6
L5	-16.7	-16.6	-18.09	-6.9	-9.1	0	1.9	2.3	0
Table 5. Three dimensional measurements of patient no 1 in terms of sagittal tilt(X), coronal tilt(Y) and rotation(Z).
	End vert:
	Apical vertebra	bold
	Stable vertebra	L1
